# Supplementary material
Source: PubMed Central journal article supplement (PMC7315636)
Supplement: ja0c03229_si_001.pdf [file ja0c03229_si_001.pdf]

**Supporting Information for**

**Dual photoisomerization on distinct potential energy surfaces  
in a UV absorbing rhodopsin**

Yusaku Hontani, Matthias Broser, Meike Luck, Jörn Weissenborn, Miroslav Kloz,

Peter Hegemann and John T.M. Kennis \*

\*Corresponding author. Email: [j.t.m.kennis@vu.nl](mailto:j.t.m.kennis@vu.nl)

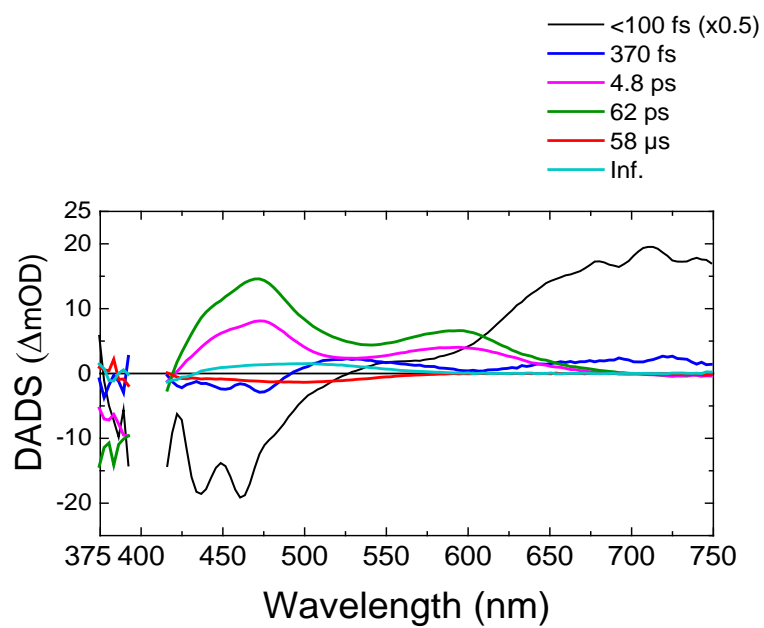

**Figure S1.** Decay-associated difference spectra (DADS) of transient absorption data of Rh-UV state of HKR1 upon 400  $\mu$ m excitation. The amplitude of the first DADS (black line) is scaled down by 2.

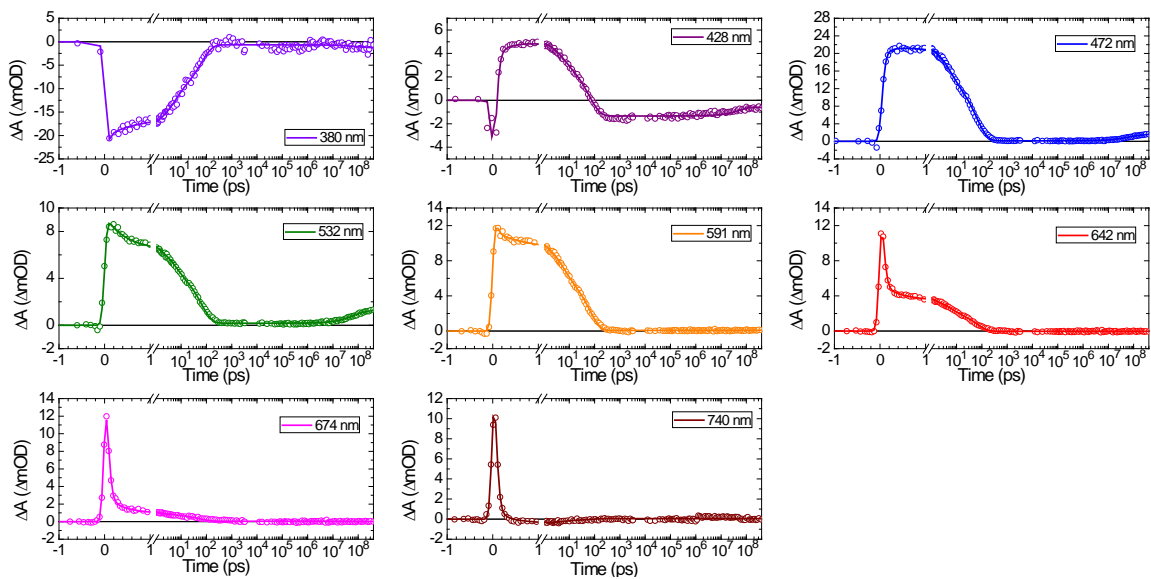

**Figure S2.** Selected transient absorption time traces with fitting curves. The open dots and solid lines show raw data and fitting curves, respectively. The time axis is linear up to 1 ps, and logarithmic thereafter.

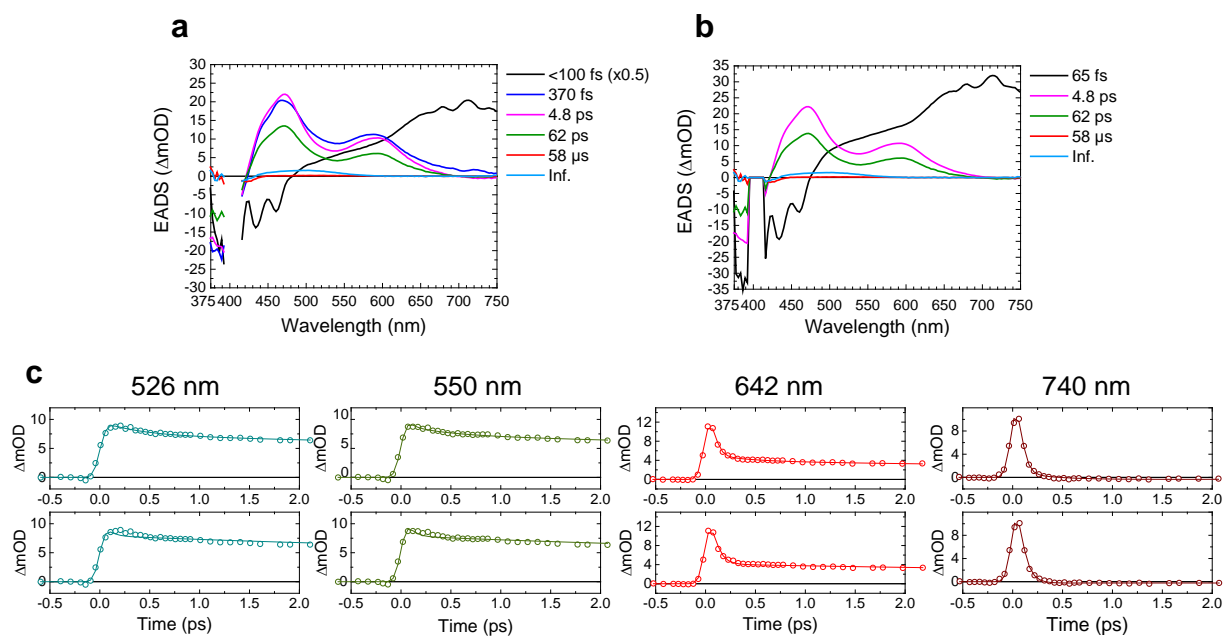

**Figure S3.** Comparison of global fitting of the transient absorption (TA) spectra with 6 and 5 components. Evolution-associated difference spectra (EADS) fitted (a) with 6 components and (b) with 5 components. (c) Fitted time traces at selected wavelengths up to 2 ps with 6 components (top) and 5 components (bottom). The open dots and solid lines show raw data and fitting curves, respectively.

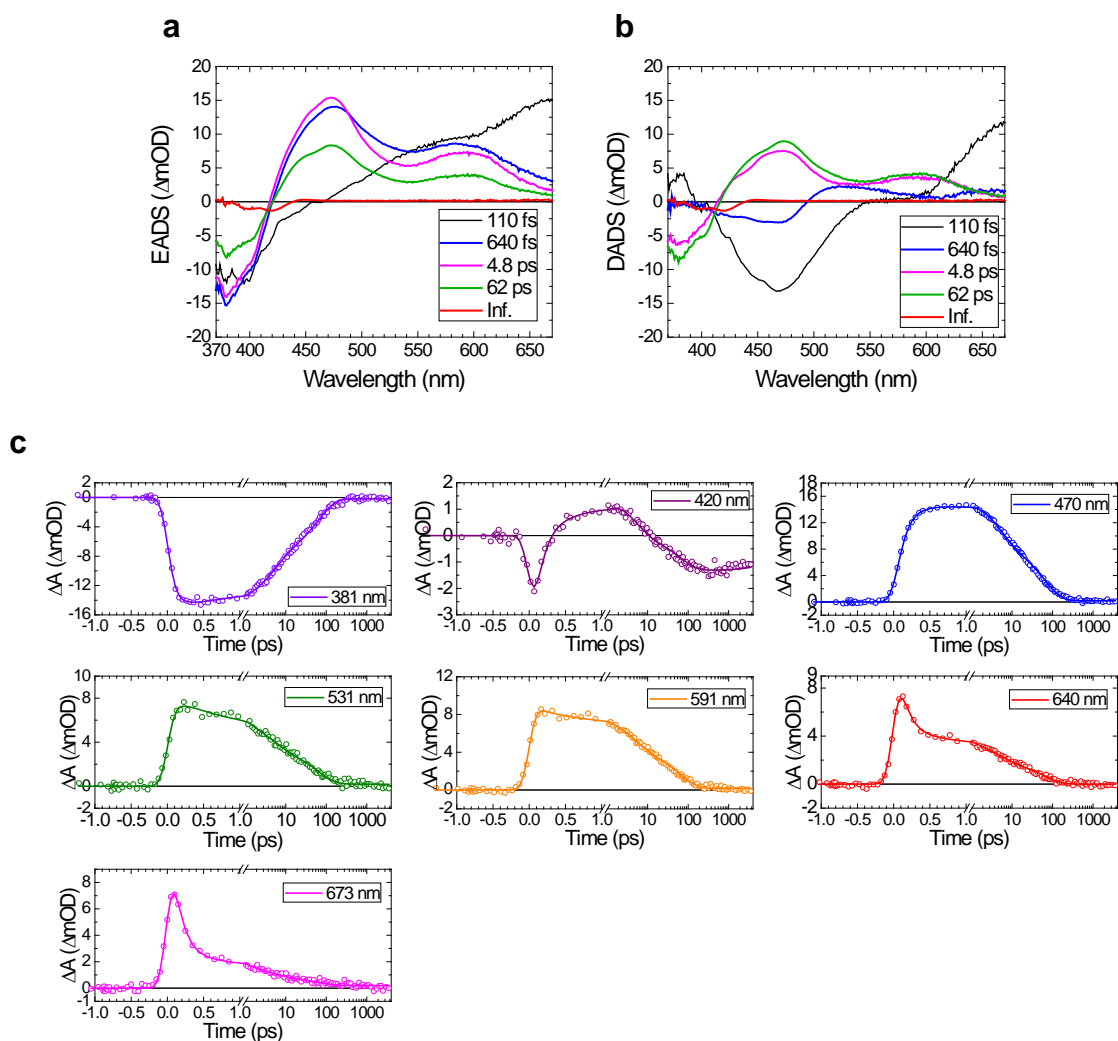

**Figure S4.** Transient absorption data from Luck *et al.*, 2012<sup>1</sup> refitted with the ultrafast 110 fs fitting component. (a) Evolution-associated difference spectra (EADS) and (b) decay-associated difference spectra (DADS). (c) Time traces at selected wavelengths. The open dots and solid lines show raw data and fitting curves, respectively.

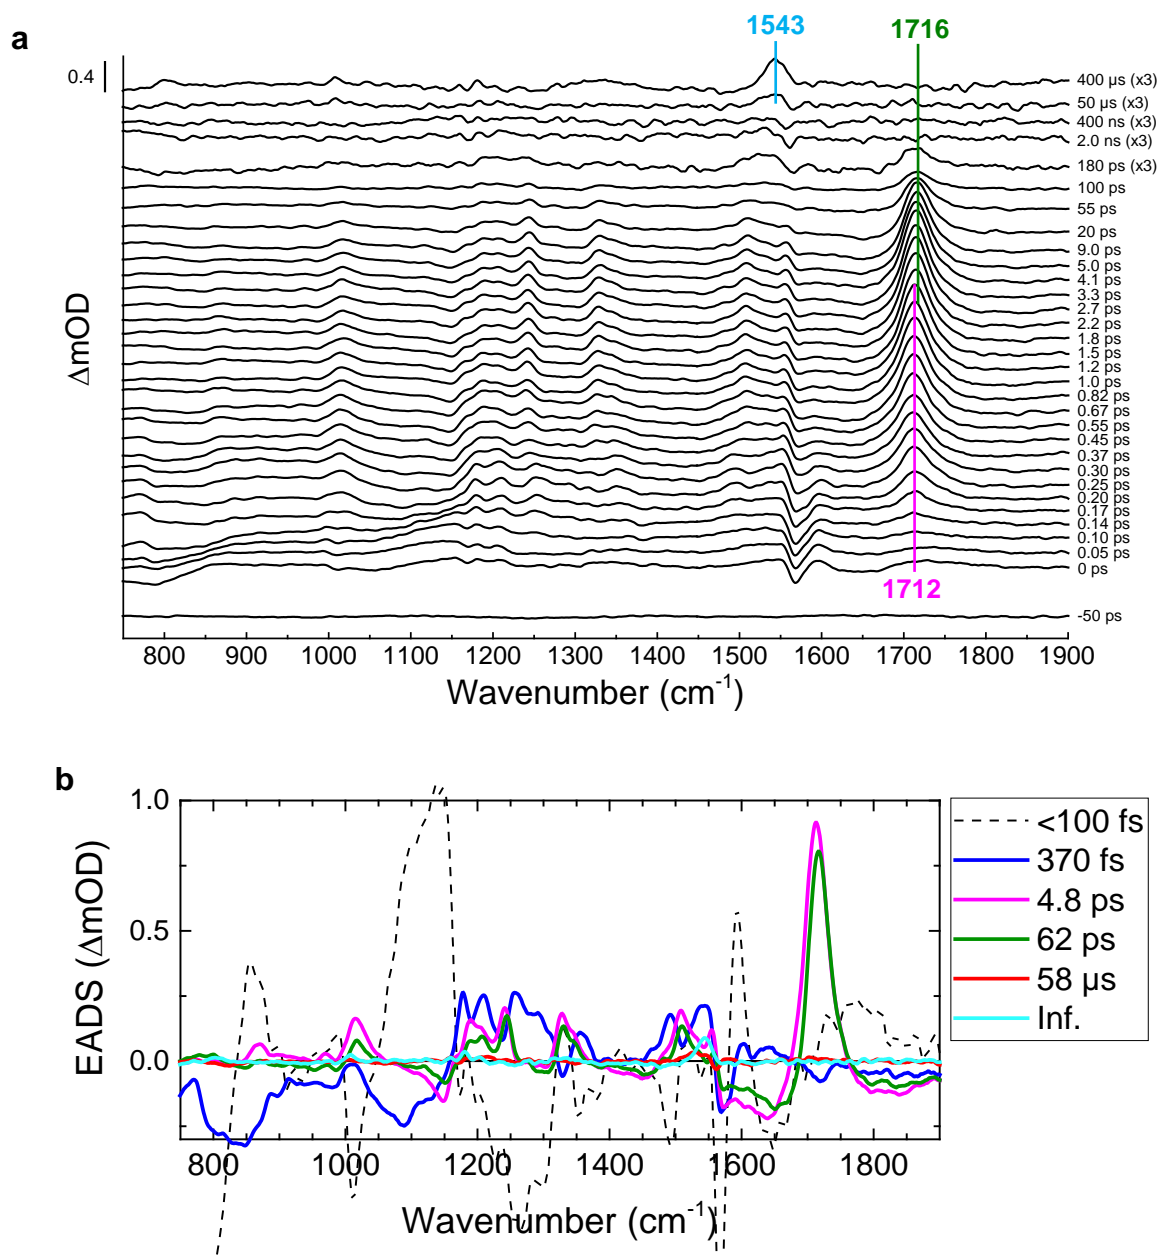

**Figure S5.** FSR spectra of Rh-UV of HKR1 upon 400-nm excitation with a preresonant 800-nm Raman pump. (a) Selected raw FSR spectra. (b) Globally fitted evolution-associated difference spectra (EADS). The same time constants to the TA data were applied to the FSRs global fitting.

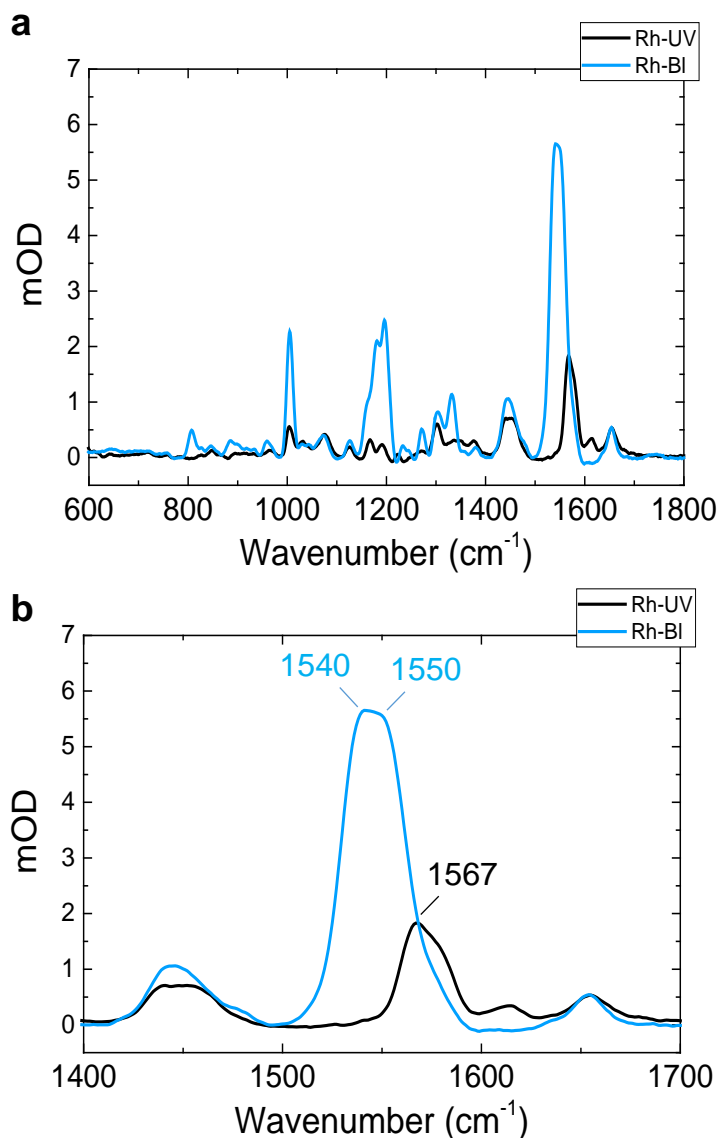

**Figure S6.** Ground state stimulated Raman spectra of Rh-UV1 (black lines) and Rh-B1 (blue lines) upon preresonant Raman excitation at 800 nm taken at identical experimental conditions. The Raman spectra of (a) the region 600–1800 cm<sup>-1</sup> and (b) the region 1400–1700 cm<sup>-1</sup>. The vibrational bands coincide with those reported by Luck *et al.*<sup>1</sup> The amplitude of Rh-B1 is higher than Rh-UV1 because of increased preresonance with the 800 nm pump of the former. Rh-UV1 shows a single RSB C=C stretch at 1567 cm<sup>-1</sup>. In addition, it shows bands at 1650 cm<sup>-1</sup> and a shoulder at 1580 cm<sup>-1</sup>. These were not observed in Luck *et al.*,<sup>1</sup> and are assigned to protein Amide I and Amide II, respectively, which become apparent due to the preresonant excitation at 800 nm. The Rh-B1 state shows double RSB C=C stretch bands at 1540 and 1550 cm<sup>-1</sup>, as in Luck *et al.*,<sup>1</sup> along with band at 1650 cm<sup>-1</sup> for the RSB C=NH mode and protein Amide I. In addition, it shows a shoulder at 1580 cm<sup>-1</sup>, assigned to Amide II.

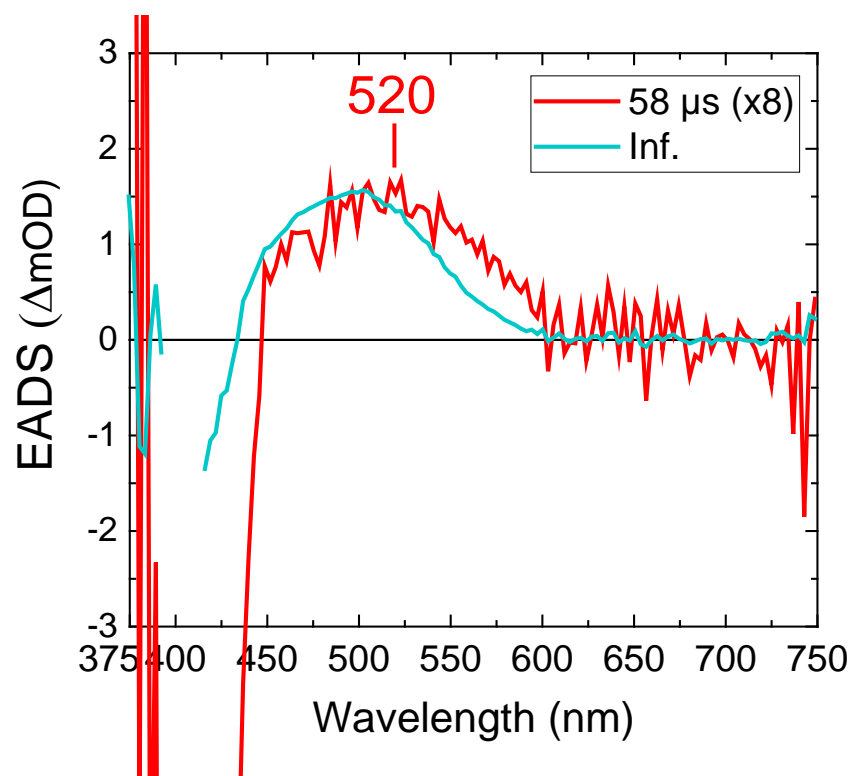

**Figure S7.** The 58  $\mu s$  transient absorption EADS (red line) scaled on the non-decaying EADS (cyan line), demonstrating that this component has a low concentration of protonated retinal species with a maximum absorption at 520 nm.



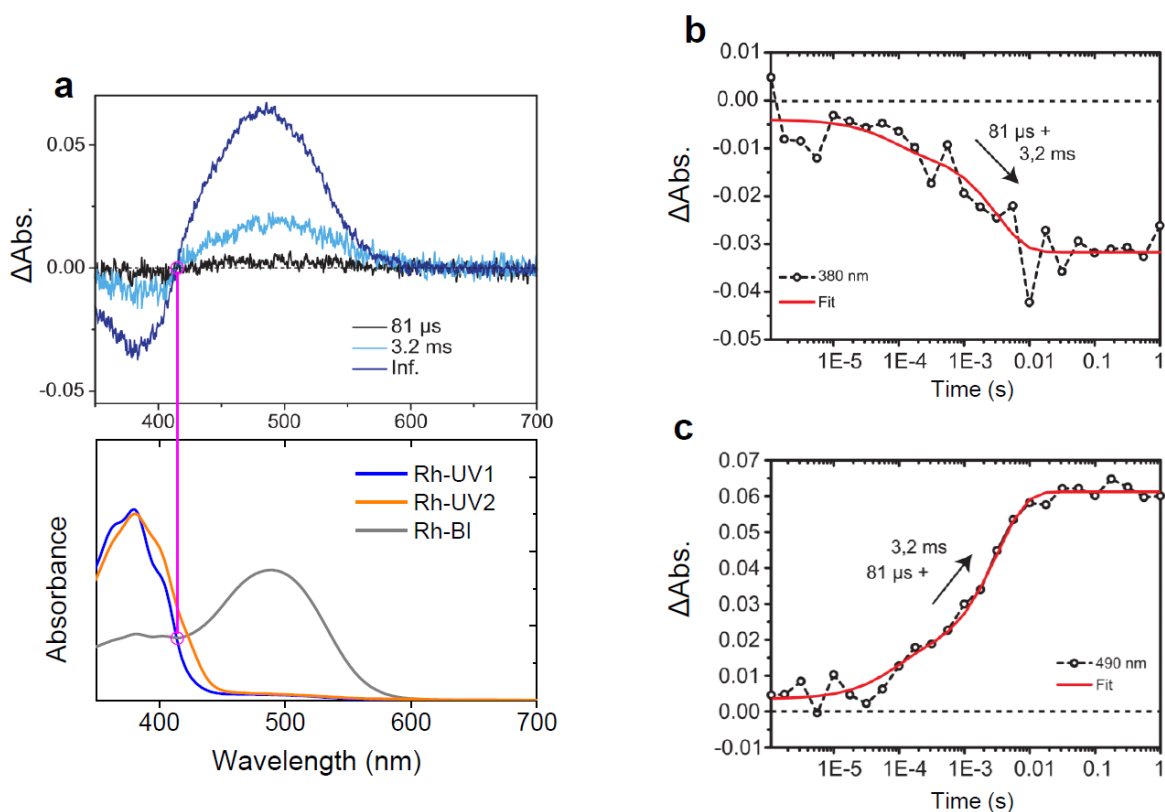

**Figure S8.** Flash photolysis experiments of Rh-UV1 state of HKR1 upon 380 nm excitation; data from Luck *et al.*, 2012.<sup>1</sup> (a) Globally fitted evolution-associated difference spectra (EADS, top panel) and ground-state absorption of Rh-UV1 (blue line), Rh-UV2 (orange line) and Rh-BI (gray line) species (bottom panel). The Rh-UV1 and Rh-UV2 states were formed under blue ( $\sim$ 470 nm) and orange ( $\sim$ 560 nm) LED illumination to the Rh-BI state, respectively. The magenta line lying across the top and bottom panels is inserted to demonstrate that the zero-crossing section of the EADS (top panel) corresponds to the spectral crossing-point of Rh-UV1 and Rh-BI (bottom panel). Time traces of flash photolysis data at (b) 380 nm and (c) 490 nm with fitting curves. The  $\Delta$ Absorption ratio at  $\sim$ 500 nm of over the 3.2 ms component (cyan) the infinite component (dark blue) is  $\sim$ 0.31 (top panel, Figure S8a). On the other hand, in Figure S7, the  $\Delta$ Absorption ratio at  $\sim$ 500 nm of the 58  $\mu$ s component (red, Figure S7) over the infinite component (cyan, Figure S7) is  $\sim$ 0.13. Since the cyan lines in Figures S7 and S8a indicate the same kinetic component, the  $\Delta$ Absorption ratio at  $\sim$ 500 nm of the 58  $\mu$ s component (red, Figure S7) over the final non-decaying component (dark blue, top panel, Figure S8a) is  $\sim$ 0.04. Therefore, it can be estimated that the fast-growing  $\sim$ 500-nm absorbing state consists of only  $\sim$ 4% of the total protonated product yield.

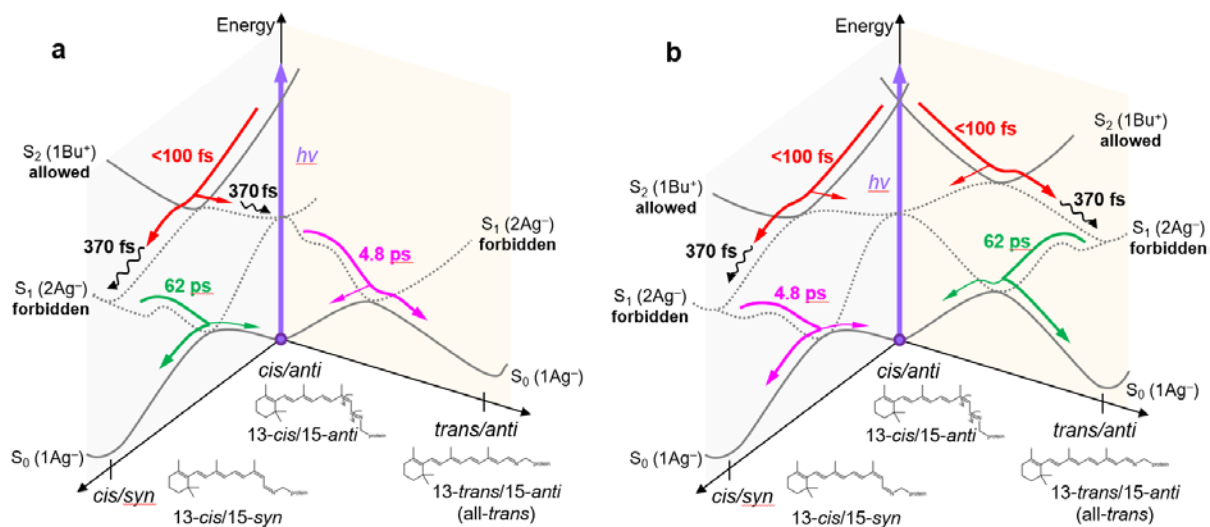

**Figure S9.** Alternative excited-state reaction models of Rh-UV HKR1. The red arrow indicates the isomerization pathway(s) on the S<sub>2</sub>–S<sub>1</sub> surfaces.

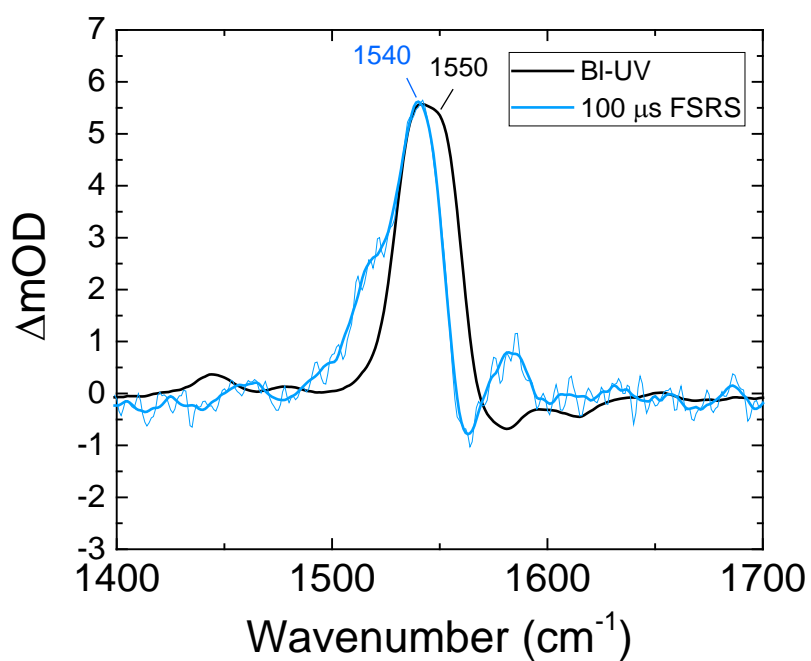

**Figure S10.** The 100  $\mu\text{s}$  FSRS spectrum (data from Figure 4c) scaled on the steady-state Rh-BI minus Rh-UV stimulated Raman spectrum (reconstructed from Figure S6) taken on the same setup.

## References

- 1 M. Luck, T. Mathes, S. Bruun, R. Fudim, R. Hagedorn, T. M. T. Nguyen, S. Kateriya, J. T. M. Kennis, P. Hildebrandt and P. Hegemann, *J. Biol. Chem.*, 2012, **287**, 40083–40090.
